# Supplementary material for: Self-assembled 3D hydrangea-like Fe2P–CoP–NDC as an efficient carrier material of Pt nanoparticles for the methanol oxidation reaction
Source: Royal Society of Chemistry journal article supplement (doi:10.1039/d3nj04696f), 2023-11-30
Supplement: d3nj04696f1.pdf [file d3nj04696f1.pdf]

## Supporting material

### **Self-assembled hydrangea-like Fe<sub>2</sub>P-CoP-NDC as efficient carrier material of Pt nanoparticles for methanol oxidation reaction**

*Fei Xie*<sup>1, \*</sup>, *Qingchun Wang*<sup>1</sup>, *Mengyu Gan*<sup>2, \*\*</sup>, *Li Ma*<sup>2</sup>

<sup>1</sup> *College of Automotive Engineering, Chengdu Aeronautic Polytechnic, Chengdu*

*610100 Sichuan, P. R. China*

<sup>2</sup> *College of Chemistry & Chemical Engineering, Chongqing University, Chongqing*

*400044, P. R. China*

---

\*Corresponding author. E-mail address: xiefei0913@126.com.

\*\*Corresponding author. E-mail address: mlsys404@126.com.

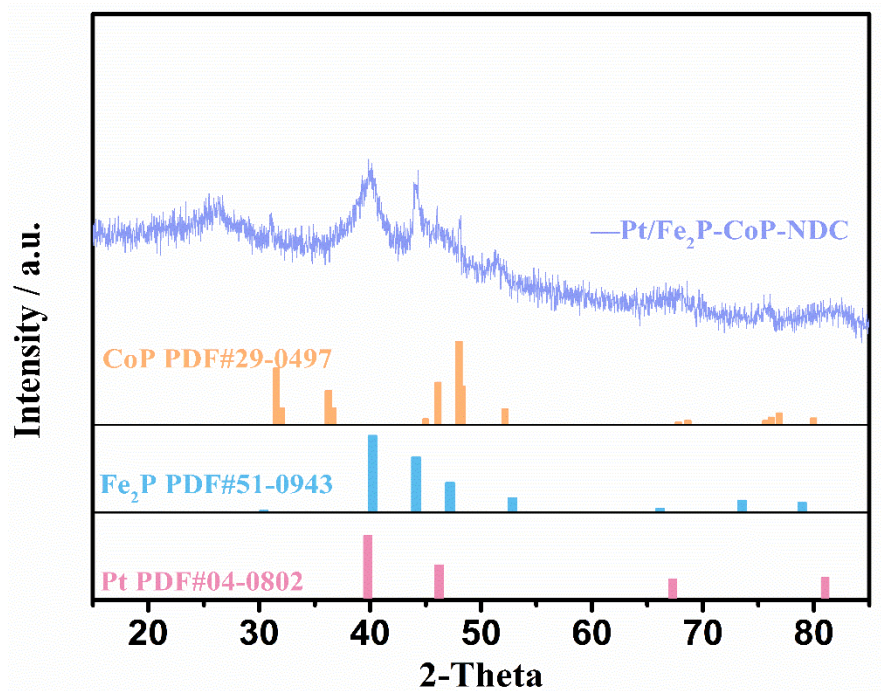

Fig. S1 XRD pattern of hydrangea-like Pt/Fe<sub>2</sub>P-CoP-NDC catalyst

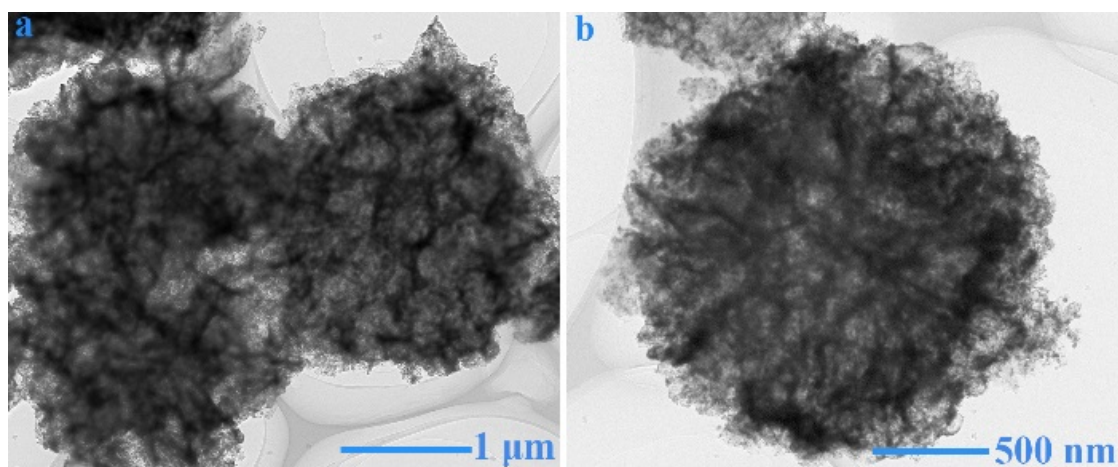

Fig. S2 TEM images of hydrangea-like Pt/Fe<sub>2</sub>P-CoP-NDC catalyst

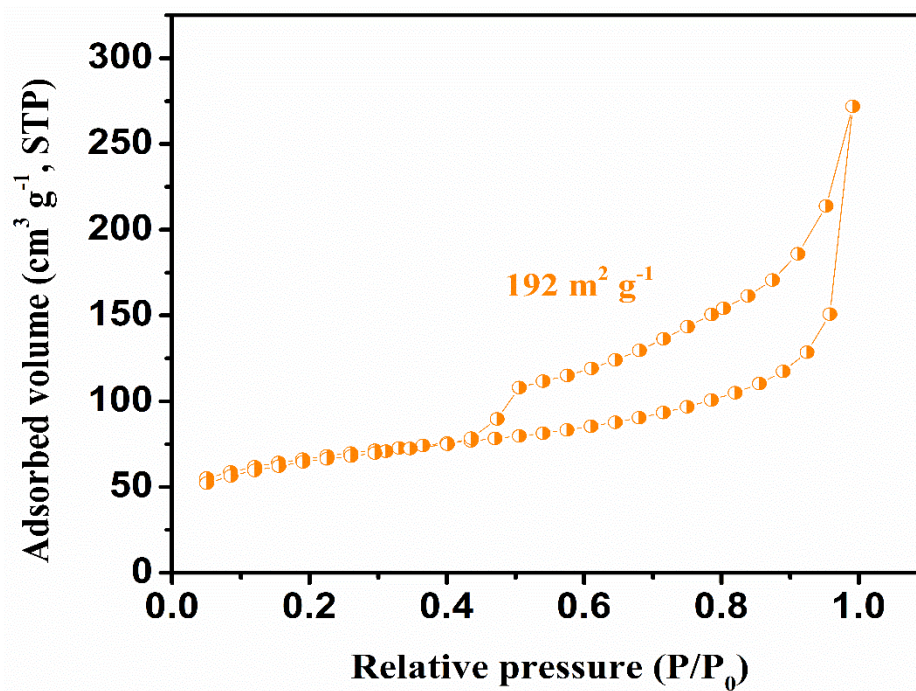

Fig. S3 Nitrogen adsorption/desorption isotherms curve of  $\text{Fe}_2\text{P-CoP-NDC}$  carrier material

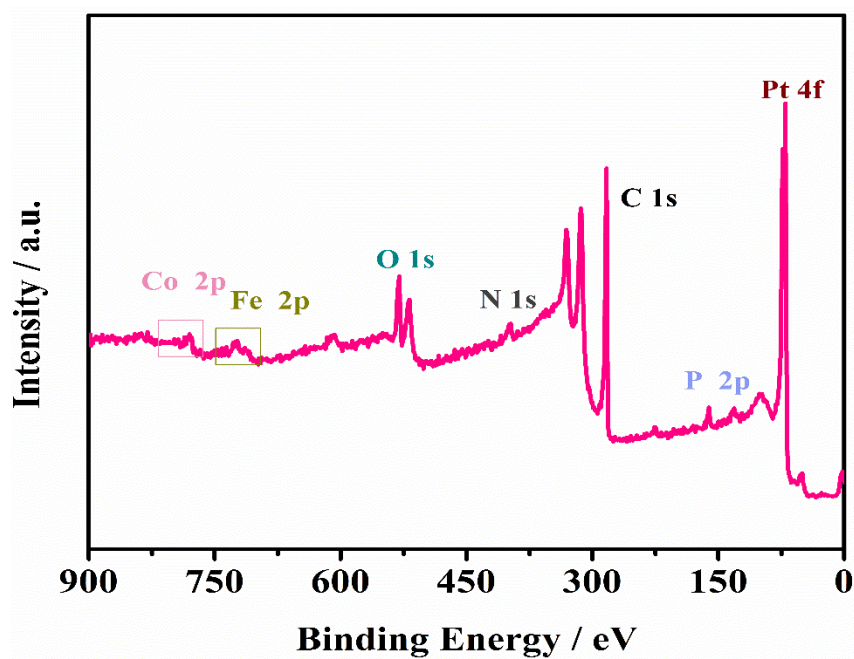

Fig. S4 XPS spectrum of hydrangea-like  $\text{Pt/Fe}_2\text{P-CoP-NDC}$  catalyst

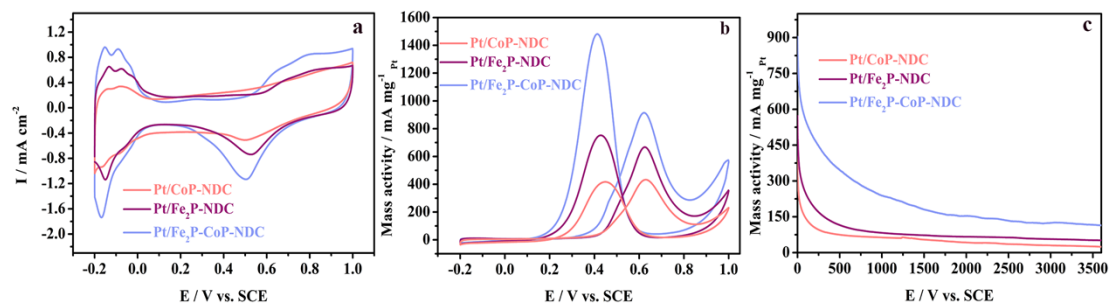

**Fig. S5** CV curves (a), mass activity (b) and chronoamperometric curves (c) of Pt/CoP-NDC, Pt/Fe<sub>2</sub>P-NDC and Pt/Fe<sub>2</sub>P-CoP-NDC catalysts.

**Table S1** The exact amount of Pt in the Pt/Fe<sub>2</sub>P-CoP-NDC and commercial Pt/C catalysts obtained by ICP-OES.

| Samples                      | Pt amount / wt% |
|------------------------------|-----------------|
| Pt/Fe <sub>2</sub> P-CoP-NDC | 19.54           |
| Commercial Pt/C              | 20              |

**Table S2** Relative content of three types Pt for Pt/Fe<sub>2</sub>P-CoP-NDC catalyst.

| Samples                      | Pt <sup>0</sup>     |         | Pt <sup>2+</sup>    |         | Pt <sup>4+</sup>    |         |
|------------------------------|---------------------|---------|---------------------|---------|---------------------|---------|
|                              | Binding energy / eV | Ratio % | Binding energy / eV | Ratio % | Binding energy / eV | Ratio % |
| Pt/Fe <sub>2</sub> P-CoP-NDC | 71.48               | 60.15   | 72.58               | 25.06   | 73.77               | 14.79   |
|                              | 74.88               |         | 76.08               |         | 77.78               |         |
